# Supplementary material
Source: bioRxiv or medRxiv preprint supplement (https://www.biorxiv.org/highwire/filestream/72700/field_highwire_adjunct_files/8/237255-7.pdf)
Supplement: Supplementary file [file 237255-7.pdf]

**Table S7. Expression of best ranked *V. nonalfalfae* candidate effector genes in hop roots**

| Gene ID   | Celeia root samples |        |           | Wye target root samples |        |           |
|-----------|---------------------|--------|-----------|-------------------------|--------|-----------|
|           | 6 dpi               | 12 dpi | 18 dpi    | 6 dpi                   | 12 dpi | 18 dpi    |
| Vna4.2    | 4.78                | 8.94   | 11.74     | 0.98                    | 5.38   | 4.71      |
| Vna5.694  | 9.43                | 8.13   | 8.03      | 8.18                    | 8.96   | 8.89      |
| Vna7.443  | 8.75                | 8.12   | 8.42      | 9.14                    | 9.29   | 8.13      |
| Vna8.691  | 10.46               | 7.25   | 6.93      | 8.50                    | 8.02   | 7.69      |
| Vna7.570  | 8.24                | 6.85   | 7.49      | 7.22                    | 7.24   | 6.79      |
| Vna3.1041 | 8.16                | 5.47   | 3.65      | 6.68                    | 6.66   | 5.84      |
| VnaUn.279 | 0.98                | 5.10   | 7.51      | <i>na</i>               | 1.80   | 0.81      |
| Vna5.876  | 5.71                | 4.40   | 5.46      | 5.96                    | 6.17   | 4.64      |
| Vna5.362  | 4.13                | 3.38   | 3.44      | 3.57                    | 4.07   | 3.21      |
| Vna3.636  | 4.55                | 3.17   | 4.21      | 3.69                    | 4.00   | 3.77      |
| Vna6.167  | 2.34                | 3.08   | 3.45      | 3.05                    | 2.58   | 3.13      |
| Vna3.350  | 3.03                | 3.03   | 2.40      | 2.29                    | 2.71   | 2.46      |
| Vna7.569  | 4.08                | 2.39   | 3.00      | 3.07                    | 3.10   | 2.76      |
| Vna6.119  | 2.84                | 2.19   | 2.06      | 1.87                    | 2.35   | 1.88      |
| Vna1.285  | 3.96                | 2.09   | 2.04      | 3.44                    | 3.76   | 2.70      |
| Vna6.168  | 1.90                | 1.56   | 2.73      | 2.60                    | 2.99   | 1.56      |
| Vna5.793  | 1.74                | 1.23   | 1.50      | 0.50                    | 1.37   | 0.32      |
| Vna3.778  | 2.26                | 1.02   | 0.37      | 2.72                    | 2.17   | 1.13      |
| Vna1.566  | 0.62                | 0.86   | 1.48      | 2.27                    | 2.98   | 2.86      |
| VnaUn.10  | 0.43                | 0.76   | -0.35     | 1.67                    | 0.04   | <i>na</i> |
| Vna1.1245 | 0.16                | 0.68   | 1.89      | -0.01                   | 0.41   | <i>na</i> |
| Vna1.1229 | 1.93                | 0.59   | 0.97      | 0.62                    | 0.91   | 0.61      |
| Vna1.565  | -0.34               | 0.49   | 0.88      | 1.84                    | 1.96   | 1.44      |
| Vna7.467  | 1.92                | 0.38   | 1.53      | 1.63                    | 2.30   | 2.22      |
| Vna1.53   | 0.89                | -0.47  | 0.35      | -0.07                   | 0.08   | -1.53     |
| Vna4.130  | 1.26                | -0.55  | -0.29     | -0.09                   | 0.55   | 0.03      |
| Vna2.179  | -0.76               | -0.66  | -0.33     | -0.08                   | -0.61  | -3.51     |
| Vna1.1274 | -1.11               | -0.68  | 0.07      | -1.95                   | -2.12  | <i>na</i> |
| Vna2.1145 | 0.75                | -0.71  | 0.14      | 1.01                    | 0.77   | 0.85      |
| Vna5.18   | -0.22               | -0.81  | -1.53     | 0.54                    | -0.26  | -1.05     |
| Vna5.588  | -1.53               | -1.07  | -1.27     | -1.14                   | -1.13  | -2.04     |
| Vna4.761  | -0.24               | -1.38  | -3.36     | -1.31                   | -1.44  | -1.94     |
| Vna6.108  | 2.31                | -1.39  | 1.36      | -1.62                   | -0.77  | 0.18      |
| Vna3.1010 | -0.61               | -1.43  | -0.55     | -0.90                   | -1.07  | -2.04     |
| Vna3.706  | -1.25               | -1.78  | -1.62     | -0.44                   | -1.41  | -0.27     |
| Vna1.1318 | -1.85               | -1.91  | -1.37     | -1.81                   | -2.30  | -3.47     |
| Vna1.575  | -3.47               | -2.31  | -4.41     | -2.52                   | -4.87  | -4.61     |
| Vna8.133  | 0.11                | -2.34  | 0.59      | -1.37                   | -1.20  | -0.69     |
| Vna8.621  | -4.50               | -2.77  | -4.95     | <i>na</i>               | -4.03  | -2.93     |
| Vna5.873  | -3.21               | -2.92  | -1.33     | -5.05                   | -4.41  | -4.02     |
| Vna9.148  | -1.90               | -3.05  | -2.71     | -2.54                   | -2.96  | -3.66     |
| Vna1.542  | -2.96               | -3.47  | <i>na</i> | -2.61                   | -2.33  | -1.20     |
| Vna7.252  | -3.89               | -3.74  | -4.89     | -1.53                   | -3.13  | -4.73     |
| Vna2.175  | -4.41               | -4.91  | -5.93     | -5.27                   | -4.85  | -5.07     |
